# Supplementary material for: Distinct Gene Expression Profiles of Matched Primary and Metastatic Triple-Negative Breast Cancers
Source: MDPI journal article supplement (doi:10.3390/cancers14102447), 2022-05-16
Supplement: s1 [file s1]

Supplementary Materials

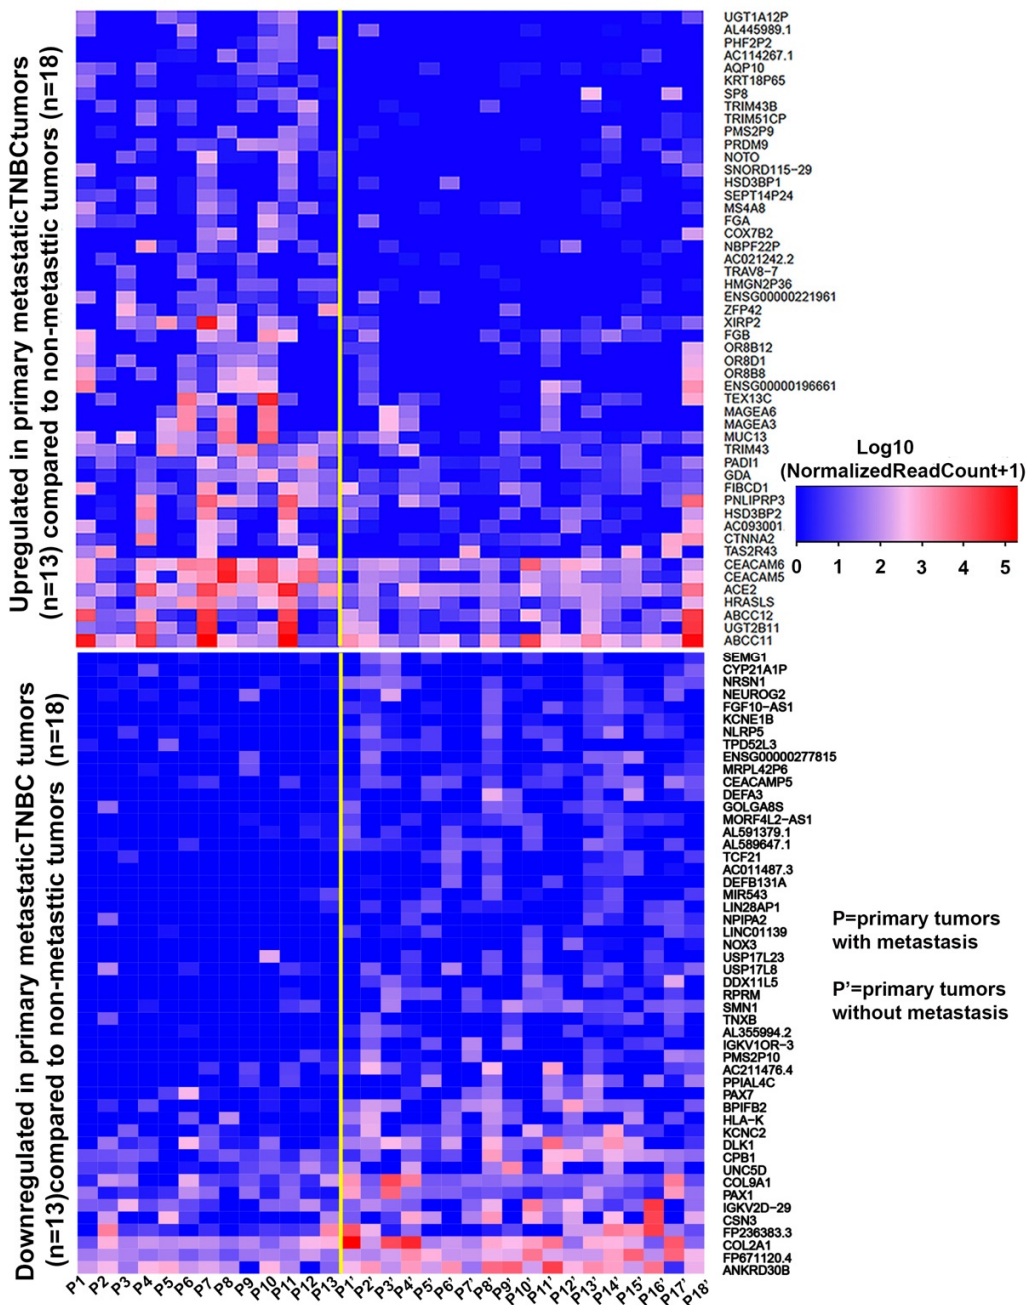

**Supplementary Figure S1.** DEGs between primary metastatic and non-metastatic TNBC tumors. Heatmap showing the top 100 upregulated and downregulated genes in primary TNBC tumors with metastasis (P; n=13) compared to primary TNBC tumors without metastasis (P'; n=18) in the Zurich cohort.

**Supplementary Table S1.** GO biological processes enriched among DEGs in the Zurich cohort.

| <b>GO ID</b> | <b>Biological Processes</b>                                      | <b><i>P</i>-Value</b> | <b>No. of Genes</b> |
|--------------|------------------------------------------------------------------|-----------------------|---------------------|
| GO:0002250   | Adaptive immune response                                         | 1.00E-20              | 36                  |
| GO:0050776   | Regulation of immune response                                    | 3.10E-16              | 34                  |
| GO:0050853   | B cell receptor signaling pathway                                | 4.22E-14              | 19                  |
| GO:0006955   | Immune response                                                  | 5.81E-13              | 47                  |
| GO:0031295   | T cell costimulation                                             | 4.07E-10              | 18                  |
| GO:0042102   | Positive regulation of T cell proliferation                      | 5.61E-09              | 15                  |
| GO:0045087   | Innate immune response                                           | 8.19E-09              | 40                  |
| GO:0006958   | Complement activation, classical pathway                         | 1.90E-08              | 18                  |
| GO:0007166   | Cell surface receptor signaling pathway                          | 9.36E-08              | 29                  |
| GO:0042110   | T cell activation                                                | 2.38E-07              | 12                  |
| GO:0050852   | T cell receptor signaling pathway                                | 1.57E-06              | 19                  |
| GO:0042113   | B cell activation                                                | 2.82E-06              | 9                   |
| GO:0034765   | Regulation of ion transmembrane transport                        | 3.10E-06              | 16                  |
| GO:0042100   | B cell proliferation                                             | 6.35E-06              | 9                   |
| GO:0006911   | Phagocytosis, engulfment                                         | 1.30E-05              | 9                   |
| GO:0007169   | Transmembrane receptor protein tyrosine kinase signaling pathway | 1.37E-05              | 14                  |
| GO:0045060   | Negative thymic T cell selection                                 | 1.41E-05              | 6                   |
| GO:0050871   | Positive regulation of B cell activation                         | 1.44E-05              | 8                   |
| GO:0030168   | Platelet activation                                              | 2.23E-05              | 15                  |
| GO:0006956   | Complement activation                                            | 2.42E-05              | 13                  |
| GO:0006910   | Phagocytosis, recognition                                        | 2.44E-05              | 8                   |
| GO:0030574   | Collagen catabolic process                                       | 3.86E-05              | 11                  |
| GO:0006954   | Inflammatory response                                            | 5.08E-05              | 29                  |
| GO:0042742   | Defense response to bacterium                                    | 7.87E-05              | 16                  |
| GO:0007204   | Positive regulation of cytosolic calcium ion concentration       | 0.000122              | 15                  |
| GO:0086010   | Membrane depolarization during action potential                  | 0.000238              | 7                   |
| GO:0038096   | Fc-gamma receptor signaling pathway involved in phagocytosis     | 0.000258              | 14                  |
| GO:0030449   | Regulation of complement activation                              | 0.000354              | 7                   |
| GO:0007165   | Signal transduction                                              | 0.000445              | 60                  |
| GO:0045086   | Positive regulation of interleukin-2 biosynthetic process        | 0.000447              | 5                   |
| GO:0006959   | Humoral immune response                                          | 0.000488              | 9                   |
| GO:0009967   | Positive regulation of signal transduction                       | 0.000776              | 9                   |
| GO:2000147   | Positive regulation of cell motility                             | 0.000859              | 5                   |
| GO:0032735   | Positive regulation of interleukin-12 production                 | 0.001114              | 6                   |
| GO:0030183   | B cell differentiation                                           | 0.001314              | 9                   |
| GO:0030049   | Muscle filament sliding                                          | 0.001321              | 7                   |
| GO:0050862   | Positive regulation of T cell receptor signaling pathway         | 0.001703              | 4                   |
| GO:0038083   | Peptidyl tyrosine autophosphorylation                            | 0.001739              | 7                   |

|            |                                                                             |          |    |
|------------|-----------------------------------------------------------------------------|----------|----|
| GO:0002407 | Dendritic cell chemotaxis                                                   | 0.00189  | 5  |
| GO:0043066 | Negative regulation of apoptotic process                                    | 0.002083 | 28 |
| GO:0006936 | Muscle contraction                                                          | 0.002573 | 11 |
| GO:0030217 | T cell differentiation                                                      | 0.002613 | 6  |
| GO:0051712 | Positive regulation of killing of cells of other organism                   | 0.003109 | 3  |
| GO:0035556 | Intracellular signal transduction                                           | 0.003434 | 25 |
| GO:0001771 | Immunological synapse formation                                             | 0.003476 | 4  |
| GO:0035115 | Embryonic forelimb morphogenesis                                            | 0.003501 | 6  |
| GO:0032753 | Positive regulation of interleukin-4 production                             | 0.003561 | 5  |
| GO:0032729 | Positive regulation of interferon-gamma production                          | 0.0036   | 7  |
| GO:0071222 | Cellular response to lipopolysaccharide                                     | 0.003826 | 11 |
| GO:0006968 | Cellular defense response                                                   | 0.00391  | 8  |
| GO:0007155 | Cell adhesion                                                               | 0.004626 | 27 |
| GO:0030198 | Extracellular matrix organization                                           | 0.005026 | 15 |
| GO:0007268 | Chemical synaptic transmission                                              | 0.005512 | 17 |
| GO:0030595 | Leukocyte chemotaxis                                                        | 0.006071 | 4  |
| GO:0071353 | Cellular response to interleukin 4                                          | 0.007047 | 5  |
| GO:0006957 | Complement activation, alternative pathway                                  | 0.007703 | 4  |
| GO:0030890 | Positive regulation of B cell proliferation                                 | 0.008309 | 6  |
| GO:0072540 | T-helper 17 cell lineage commitment                                         | 0.009921 | 3  |
| GO:0033153 | T cell receptor V(D)J recombination                                         | 0.009921 | 3  |
| GO:0042391 | Regulation of membrane potential                                            | 0.01101  | 8  |
| GO:0019228 | Neuronal action potential                                                   | 0.012258 | 5  |
| GO:0035116 | Embryonic hindlimb morphogenesis                                            | 0.012258 | 5  |
| GO:0038095 | Fc-epsilon receptor signaling pathway                                       | 0.013848 | 13 |
| GO:0001768 | Establishment of T cell polarity                                            | 0.014563 | 3  |
| GO:0046632 | Alpha-beta T cell differentiation                                           | 0.014563 | 3  |
| GO:2000107 | Negative regulation of leukocyte apoptotic process                          | 0.014563 | 3  |
| GO:0070588 | Calcium ion transmembrane transport                                         | 0.015801 | 10 |
| GO:0006814 | Sodium ion transport                                                        | 0.016351 | 8  |
| GO:0045860 | Positive regulation of protein kinase activity                              | 0.01792  | 6  |
| GO:0006898 | Receptor-mediated endocytosis                                               | 0.01895  | 13 |
| GO:0045954 | Positive regulation of natural killer cell-mediated cytotoxicity            | 0.019483 | 4  |
| GO:0050869 | Negative regulation of B cell activation                                    | 0.019952 | 3  |
| GO:0002606 | Positive regulation of dendritic cell antigen processing and presentation   | 0.019952 | 3  |
| GO:0072678 | T cell migration                                                            | 0.019952 | 3  |
| GO:0042832 | Defense response to protozoan                                               | 0.022588 | 4  |
| GO:0007157 | Heterophilic cell-cell adhesion via plasma membrane cell adhesion molecules | 0.022876 | 6  |
| GO:0050850 | Positive regulation of calcium-mediated signaling                           | 0.025945 | 4  |
| GO:0048304 | Positive regulation of isotype switching to IgG isotypes                    | 0.026034 | 3  |
| GO:0034695 | Response to prostaglandin E                                                 | 0.026034 | 3  |
| GO:0007160 | Cell-matrix adhesion                                                        | 0.027456 | 8  |

|            |                                                                  |          |    |
|------------|------------------------------------------------------------------|----------|----|
| GO:0048469 | Cell maturation                                                  | 0.028785 | 5  |
| GO:0019835 | Cytolysis                                                        | 0.029555 | 4  |
| GO:0050764 | Regulation of phagocytosis                                       | 0.03276  | 3  |
| GO:0046641 | Positive regulation of alpha-beta T cell proliferation           | 0.03276  | 3  |
| GO:0090023 | Positive regulation of neutrophil chemotaxis                     | 0.033415 | 4  |
| GO:0046427 | Positive regulation of JAK-STAT cascade                          | 0.033415 | 4  |
| GO:0071345 | Cellular response to cytokine stimulus                           | 3.34E-02 | 4  |
| GO:0030199 | Collagen fibril organization                                     | 3.73E-02 | 5  |
| GO:0060021 | Palate development                                               | 3.73E-02 | 7  |
| GO:0032733 | Positive regulation of interleukin-10 production                 | 3.75E-02 | 4  |
| GO:0009617 | Response to bacterium                                            | 3.75E-02 | 4  |
| GO:0007267 | Cell-cell signaling                                              | 3.85E-02 | 15 |
| GO:0033209 | Tumor necrosis factor-mediated signaling pathway                 | 0.039078 | 9  |
| GO:0002377 | Immunoglobulin production                                        | 0.040081 | 3  |
| GO:0042127 | Regulation of cell proliferation                                 | 0.040087 | 12 |
| GO:0001895 | Retina homeostasis                                               | 0.040381 | 5  |
| GO:0034220 | Ion transmembrane transport                                      | 0.042804 | 13 |
| GO:0051209 | Release of sequestered calcium ion into cytosol                  | 0.043637 | 5  |
| GO:0050900 | Leukocyte migration                                              | 0.046074 | 9  |
| GO:0046718 | Viral entry into host cells                                      | 0.046145 | 7  |
| GO:0007159 | Leukocyte cell-cell adhesion                                     | 0.046473 | 4  |
| GO:0001816 | Cytokine production                                              | 0.046473 | 4  |
| GO:0042511 | Positive regulation of tyrosine phosphorylation of Stat1 protein | 0.047952 | 3  |
| GO:0050868 | Negative regulation of T cell activation                         | 0.047952 | 3  |

**Supplementary Table S2.** KEGG pathways enriched among DEGs in the Zurich cohort.

| <b>KEGG ID</b> | <b>Pathway</b>                               | <b>P-Value</b> | <b>No. of Genes</b> |
|----------------|----------------------------------------------|----------------|---------------------|
| hsa05340       | Primary immunodeficiency                     | 1.59E-13       | 16                  |
| hsa04640       | Hematopoietic cell lineage                   | 1.27E-09       | 19                  |
| hsa04060       | Cytokine-cytokine receptor interaction       | 1.54E-07       | 28                  |
| hsa04660       | T cell receptor signaling pathway            | 2.54E-06       | 16                  |
| hsa04514       | Cell adhesion molecules (CAMs)               | 1.27E-05       | 18                  |
| hsa05146       | Amoebiasis                                   | 2.48E-05       | 15                  |
| hsa04512       | ECM-receptor interaction                     | 6.15E-05       | 13                  |
| hsa04064       | NF-kappa B signaling pathway                 | 6.15E-05       | 13                  |
| hsa04670       | Leukocyte transendothelial migration         | 6.24E-05       | 15                  |
| hsa04650       | Natural killer cell-mediated cytotoxicity    | 0.00012        | 15                  |
| hsa04630       | Jak-STAT signaling pathway                   | 0.000222       | 16                  |
| hsa04672       | Intestinal immune network for IgA production | 0.000243       | 9                   |
| hsa04510       | Focal adhesion                               | 0.000449       | 19                  |
| hsa04662       | B cell receptor signaling pathway            | 0.000783       | 10                  |
| hsa05162       | Measles                                      | 0.003052       | 13                  |
| hsa04610       | Complement and coagulation cascades          | 0.00326        | 9                   |
| hsa04020       | Calcium signaling pathway                    | 0.005272       | 15                  |
| hsa04080       | Neuroactive ligand-receptor interaction      | 0.005342       | 20                  |
| hsa05032       | Morphine addiction                           | 0.005433       | 10                  |
| hsa04727       | GABAergic synapse                            | 0.011449       | 9                   |
| hsa04530       | Tight junction                               | 0.013072       | 9                   |
| hsa04972       | Pancreatic secretion                         | 0.018953       | 9                   |
| hsa04611       | Platelet activation                          | 0.019112       | 11                  |
| hsa04713       | Circadian entrainment                        | 0.021278       | 9                   |
| hsa05322       | Systemic lupus erythematosus                 | 0.023094       | 11                  |
| hsa04151       | PI3K-Akt signaling pathway                   | 0.024577       | 21                  |
| hsa04723       | Retrograde endocannabinoid signaling         | 0.029455       | 9                   |
| hsa05144       | Malaria                                      | 0.031148       | 6                   |

**Supplementary Table S3.** GO biological processes enriched among DEGs in Stavanger cohort.

| GO ID      | Biological Processes                                                              | P-Value     | No of Genes |
|------------|-----------------------------------------------------------------------------------|-------------|-------------|
| GO:0006936 | Muscle contraction                                                                | 1.74E-06    | 14          |
| GO:0006508 | Proteolysis                                                                       | 1.23E-05    | 30          |
| GO:0006805 | Xenobiotic metabolic process                                                      | 1.04E-04    | 10          |
| GO:0030049 | Muscle filament sliding                                                           | 2.69E-04    | 7           |
| GO:0007596 | Blood coagulation                                                                 | 1.70E-03    | 13          |
| GO:0042742 | Defense response to bacterium                                                     | 2.69E-03    | 11          |
| GO:0048246 | Macrophage chemotaxis                                                             | 3.30E-03    | 4           |
| GO:0014059 | Regulation of dopamine secretion                                                  | 3.30E-03    | 4           |
| GO:0008202 | Steroid metabolic process                                                         | 3.57E-03    | 6           |
| GO:0006937 | Regulation of muscle contraction                                                  | 4.13E-03    | 4           |
| GO:0030154 | Cell differentiation                                                              | 4.19E-03    | 22          |
| GO:0030574 | Collagen catabolic process                                                        | 4.32E-03    | 7           |
| GO:0030855 | Epithelial cell differentiation                                                   | 6.71E-03    | 7           |
| GO:0044267 | Cellular protein metabolic process                                                | 7.70E-03    | 9           |
| GO:0009404 | Toxin metabolic process                                                           | 8.12E-03    | 3           |
| GO:0007409 | Axonogenesis                                                                      | 9.41E-03    | 8           |
| GO:0022617 | Extracellular matrix disassembly                                                  | 9.92E-03    | 7           |
| GO:0071880 | Adenylate cyclase-activating adrenergic receptor signaling pathway                | 1.01E-02    | 4           |
| GO:0042475 | Odontogenesis of dentin-containing tooth                                          | 1.02E-02    | 6           |
| GO:0001867 | Complement activation, lectin pathway                                             | 1.12E-02    | 3           |
| GO:0019229 | Regulation of vasoconstriction                                                    | 1.16E-02    | 4           |
| GO:0045987 | Positive regulation of smooth muscle contraction                                  | 0.013325371 | 4           |
| GO:0007268 | Chemical synaptic transmission                                                    | 0.013666242 | 13          |
| GO:0060054 | Positive regulation of epithelial cell proliferation involved in wound healing    | 0.014687488 | 3           |
| GO:0030326 | Embryonic limb morphogenesis                                                      | 0.015242947 | 5           |
| GO:0071377 | Cellular response to glucagon stimulus                                            | 0.015242947 | 5           |
| GO:0055085 | Transmembrane transport                                                           | 0.015308417 | 13          |
| GO:0042493 | Response to drug                                                                  | 0.015768856 | 15          |
| GO:0007204 | Positive regulation of cytosolic calcium ion concentration                        | 0.015802623 | 9           |
| GO:0007586 | Digestion                                                                         | 0.01766679  | 6           |
| GO:0052697 | Xenobiotic glucuronidation                                                        | 0.018586107 | 3           |
| GO:0030299 | Intestinal cholesterol absorption                                                 | 0.018586107 | 3           |
| GO:0051967 | Negative regulation of synaptic transmission, glutamatergic                       | 0.018586107 | 3           |
| GO:0030511 | Positive regulation of transforming growth factor-beta receptor signaling pathway | 0.019232513 | 4           |
| GO:0003009 | Skeletal muscle contraction                                                       | 0.019232513 | 4           |
| GO:0031069 | Hair follicle morphogenesis                                                       | 0.026365735 | 4           |

|            |                                                        |             |    |
|------------|--------------------------------------------------------|-------------|----|
| GO:0003341 | Cilium movement                                        | 0.026365735 | 4  |
| GO:0015721 | Bile acid and bile salt transport                      | 0.026365735 | 4  |
| GO:0006081 | Cellular aldehyde metabolic process                    | 0.027509606 | 3  |
| GO:0007275 | Multicellular organism development                     | 0.028275062 | 21 |
| GO:0019228 | Neuronal action potential                              | 0.029016236 | 4  |
| GO:0007616 | Long-term memory                                       | 0.029016236 | 4  |
| GO:0006958 | Complement activation, classical pathway               | 0.032277394 | 7  |
| GO:0042572 | Retinol metabolic process                              | 0.034723245 | 4  |
| GO:0030449 | Regulation of complement activation                    | 0.034723245 | 4  |
| GO:0030324 | Lung development                                       | 0.036170886 | 6  |
| GO:0051926 | Negative regulation of calcium ion transport           | 0.037801532 | 3  |
| GO:0030818 | Negative regulation of cAMP biosynthetic process       | 0.037801532 | 3  |
| GO:0030239 | Myofibril assembly                                     | 0.037801532 | 3  |
| GO:0006809 | Nitric oxide biosynthetic process                      | 0.037801532 | 3  |
| GO:0001516 | Prostaglandin biosynthetic process                     | 0.043413459 | 3  |
| GO:0090090 | Negative regulation of canonical Wnt signaling pathway | 0.043689104 | 9  |
| GO:0007186 | G-protein coupled receptor signaling pathway           | 0.044036265 | 31 |
| GO:0002088 | Lens development in camera-type eye                    | 0.044283479 | 4  |
| GO:0002930 | Trabecular meshwork development                        | 0.047540711 | 2  |
| GO:1903027 | Regulation of opsonization                             | 0.047540711 | 2  |
| GO:0030198 | Extracellular matrix organization                      | 0.04793664  | 10 |
| GO:0050905 | Neuromuscular process                                  | 0.049312268 | 3  |

**Supplementary Table S4.** KEGG pathways enriched among DEGs in the Stavanger cohort.

| <b>KEGG ID</b> | <b>Pathway</b>                               | <b>P-Value</b> | <b>No of Genes</b> |
|----------------|----------------------------------------------|----------------|--------------------|
| hsa00830       | Retinol metabolism                           | 3.44E-04       | 16                 |
| hsa04610       | Complement and coagulation cascades          | 5.78E-04       | 19                 |
| hsa05204       | Chemical carcinogenesis                      | 1.55E-03       | 28                 |
| hsa00982       | Drug metabolism - cytochrome P450            | 2.56E-03       | 16                 |
| hsa04976       | Bile secretion                               | 2.79E-03       | 18                 |
| hsa00980       | Metabolism of xenobiotics by cytochrome P450 | 0.004141708    | 15                 |
| hsa05414       | Dilated cardiomyopathy                       | 0.008279868    | 13                 |
| hsa00983       | Drug metabolism - other enzymes              | 0.008346719    | 13                 |
| hsa04080       | Neuroactive ligand-receptor interaction      | 0.009468349    | 15                 |
| hsa04972       | Pancreatic secretion                         | 0.014087876    | 15                 |
| hsa00350       | Tyrosine metabolism                          | 0.01512502     | 16                 |
| hsa04916       | Melanogenesis                                | 0.020284892    | 9                  |
| hsa00140       | Steroid hormone biosynthesis                 | 0.021420157    | 19                 |
| hsa00590       | Arachidonic acid metabolism                  | 0.026041828    | 10                 |
| hsa04974       | Protein digestion and absorption             | 0.034324215    | 13                 |
| hsa04540       | Gap junction                                 | 0.034324215    | 9                  |
| hsa04024       | cAMP signaling pathway                       | 0.047122625    | 15                 |



**Supplementary Table S5.** Enriched fractions of the 64 cell types in primary and matched TNBC tumors in the Zurich cohort.

| Cell Type                             | Group   | xCell Enrichment Scores for 64- Cell Types<br>(mean $\pm$ SD)-Zurich Cohort |                                     |             |
|---------------------------------------|---------|-----------------------------------------------------------------------------|-------------------------------------|-------------|
|                                       |         | Primary Tumors<br>(n=11)                                                    | Matched Metastatic<br>Tumors (n=11) | P-<br>Value |
| Adipocytes                            | Stromal | 0.006 $\pm$ 0.004                                                           | 0.013 $\pm$ 0.007                   | 0.349       |
| Astrocytes                            | Others  | 0.0 $\pm$ 0.0                                                               | 0.008 $\pm$ 0.0045                  | 0.079       |
| B cells                               | Immune  | 0.008 $\pm$ 0.004                                                           | 0.200 $\pm$ 0.081                   | <0.05       |
| Basophils                             | Immune  | 0.018 $\pm$ 0.007                                                           | 0.011 $\pm$ 0.006                   | 0.481       |
| CD4 T cells                           | Immune  | 0.002 $\pm$ 0.001                                                           | 0.041 $\pm$ 0.017                   | <0.05       |
| Central Memory CD4+<br>T cell         | Immune  | 0.0 $\pm$ 0.0                                                               | 0.031 $\pm$ 0.012                   | <0.05       |
| Effector Memory CD4+<br>T cell        | Immune  | 0.0 $\pm$ 0.0                                                               | 0.036 $\pm$ 0.014                   | <0.05       |
| CD4 memory T cells                    | Immune  | 0.0057 $\pm$ 0.0026                                                         | 0.032 $\pm$ 0.015                   | 0.107       |
| CD4 naïve T cells                     | Immune  | 0.00087 $\pm$ 0.0005                                                        | 0.027 $\pm$ 0.015                   | 0.082       |
| CD8 T cells                           | Immune  | 0.00036 $\pm$ 0.0003                                                        | 0.026 $\pm$ 0.011                   | <0.05       |
| Central Memory CD8+<br>T cell         | Immune  | 0.0036 $\pm$ 0.001                                                          | 0.028 $\pm$ 0.012                   | 0.051       |
| Effector Memory<br>CD8+T cell         | Immune  | 0.0032 $\pm$ 0.002                                                          | 0.0032 $\pm$ 0.002                  | 0.153       |
| CD8 naïve T cells                     | Immune  | 0.00095 $\pm$ 0.0006                                                        | 0.004 $\pm$ 0.0027                  | 0.308       |
| Common Lymphoid<br>Progenitor         | Stem    | 0.014 $\pm$ 0.005218                                                        | 0.013 $\pm$ 0.0048                  | 0.944       |
| Common Myeloid<br>Progenitor          | Stem    | 0.00013 $\pm$ 8.954e-00                                                     | 0.0005 $\pm$ 0.0003                 | 0.287       |
| Chondrocytes                          | Stromal | 0.0031 $\pm$ 0.0023                                                         | 0.01325 $\pm$ 0.005                 | 0.119       |
| Class-switched memory<br>B cells      | Immune  | 0.019 $\pm$ 0.008                                                           | 0.062 $\pm$ 0.018                   | <0.05       |
| Dendritic Cells                       | Immune  | 0.00016 $\pm$ 0.0001                                                        | 0.003 $\pm$ 0.002                   | 0.157       |
| Endothelial cells                     | Stromal | 0.012 $\pm$ 0.004                                                           | 0.023 $\pm$ 0.009                   | 0.271       |
| Eosinophils                           | Immune  | 8.182e-005 $\pm$ 8.182e-<br>005                                             | 8.182e-005 $\pm$ 8.182e-<br>005     | 0.329       |
| Epithelial cells                      | Others  | 0.014 $\pm$ 0.0036                                                          | 0.071 $\pm$ 0.018                   | <0.05       |
| Erythrocytes                          | Stem    | 1.818e-005 $\pm$ 1.818e-<br>005                                             | 0.0 $\pm$ 0.0                       | 0.329       |
| Fibroblasts                           | Stromal | 0.046 $\pm$ 0.01716                                                         | 0.021 $\pm$ 0.009                   | 0.221       |
| Granulocyte<br>Macrophage Progenitor  | Stem    | 0.001 $\pm$ 0.001041                                                        | 0.0025 $\pm$ 0.0025                 | 0.633       |
| HSC                                   | Stem    | 0.168 $\pm$ 0.043                                                           | 0.195 $\pm$ 0.046                   | 0.683       |
| Hepatocytes                           | Others  | 0.00054 $\pm$ 0.0003                                                        | 0.00013 $\pm$ 0.00013               | 0.238       |
| Keratinocytes                         | Others  | 0.003 $\pm$ 0.0019                                                          | 0.017 $\pm$ 0.009                   | 0.167       |
| Megakaryocyte<br>Erythroid Progenitor | Stem    | 0.016 $\pm$ 0.005                                                           | 0.008 $\pm$ 0.003                   | 0.117       |

|                                 |         |                             |                           |       |
|---------------------------------|---------|-----------------------------|---------------------------|-------|
| Multipotent Progenitor          | Stem    | $0.0 \pm 0.0$               | $0.0 \pm 0.0$             |       |
| Mesenchymal Stem Cells          | Stem    | $0.074 \pm 0.024$           | $0.063 \pm 0.018$         | 0.718 |
| Macrophages                     | Immune  | $0.005 \pm 0.002$           | $0.001 \pm 0.0005$        | 0.070 |
| Macrophage M1                   | Immune  | $0.002 \pm 0.0015$          | $0.004 \pm 0.0014$        | 0.282 |
| Macrophage M2                   | Immune  | $0.005 \pm 0.003$           | $0.003 \pm 0.0015$        | 0.580 |
| Memory B cells                  | Immune  | $0.0004 \pm 0.0004$         | $0.068 \pm 0.028$         | <0.05 |
| Mesangial cells                 | Others  | $0.0057 \pm 0.0016$         | $0.008 \pm 0.0027$        | 0.379 |
| Monocytes                       | Immune  | $0.0 \pm 0.0$               | $0.00089 \pm 0.0005$      | 0.138 |
| Myocytes                        | Stromal | $0.0107 \pm 0.007629$       | $0.0007545 \pm 0.0007545$ | 0.209 |
| NK cells                        | Immune  | 0                           | 0                         |       |
| Natural killer T cells          | Immune  | $0.0099 \pm 0.0035$         | $0.0167 \pm 0.006$        | 0.366 |
| Neutrophils                     | Immune  | 0                           | 0                         |       |
| Neurons                         | Others  | $0.0003 \pm 0.00016$        | $0.0002 \pm 0.000107$     | 0.459 |
| Osteoblasts                     | Stromal | $0.0005 \pm 0.0003$         | $0.0 \pm 0.0$             | 0.152 |
| Pericytes                       | Stromal | $0.034 \pm 0.011$           | $0.0341 \pm 0.009$        | 0.987 |
| Plasma cells                    | Immune  | $0.0005 \pm 0.0004$         | $0.01 \pm 0.006$          | 0.157 |
| Platelets                       | Stem    | $0.0 \pm 0.0$               | $0.0019 \pm 0.0012$       | 0.149 |
| Preadipocytes                   | Stromal | $0.023 \pm 0.007$           | $0.02011 \pm 0.009$       | 0.755 |
| Sebocytes                       | Others  | $8.182e-005 \pm 5.012e-005$ | $0.0051 \pm 0.003$        | 0.169 |
| Skeletal muscle                 | Stromal | $0.006 \pm 0.006$           | $0.001 \pm 0.0004$        | 0.397 |
| Smooth muscle                   | Stromal | $0.062 \pm 0.019$           | $0.098 \pm 0.022$         | 0.235 |
| Gamma delta T cells             | Immune  | $0.005 \pm 0.0025$          | $0.004 \pm 0.002$         | 0.688 |
| Th1 cells                       | Immune  | $0.004 \pm 0.003$           | $0.002 \pm 0.0015$        | 0.549 |
| Th2 cells                       | Immune  | $0.031 \pm 0.012$           | $0.014 \pm 0.009$         | 0.325 |
| Regulatory T cells              | Immune  | $0.0019 \pm 0.001002$       | $0.008 \pm 0.003$         | 0.078 |
| Activated dendritic cells       | Immune  | $0.0 \pm 0.0$               | $0.014 \pm 0.007$         | 0.063 |
| Conventional dendritic cells    | Immune  | $0.022 \pm 0.007$           | $0.046 \pm 0.022$         | 0.330 |
| Immature dendritic cells        | Immune  | $0.052 \pm 0.011$           | $0.081 \pm 0.029$         | 0.363 |
| Lymphatic endothelial cells     | Stromal | $0.0016 \pm 0.00083$        | $0.004 \pm 0.003$         | 0.394 |
| Microvascular endothelial cells | Stromal | $0.009 \pm 0.003$           | $0.022 \pm 0.008$         | 0.167 |
| Naïve B cells                   | Immune  | $0.002 \pm 0.0014$          | $0.040 \pm 0.016$         | <0.05 |
| Plasmacytoid cells              | Immune  | $0.0 \pm 0.0$               | $0.009 \pm 0.005$         | 0.099 |
| Pro-B cells                     | Immune  | $0.0011 \pm 0.0011$         | $0.012 \pm 0.005$         | 0.076 |
| Mast cells                      | Immune  | $0.0 \pm 0.0$               | $0.0016 \pm 0.0009$       | 0.085 |
| Megakaryocytes                  | Stem    | $0.0005 \pm 0.0002$         | $0.0009 \pm 0.0006$       | 0.566 |
| Melanocytes                     | Others  | $0.0005 \pm 0.0001$         | $0.0002 \pm 0.0001$       | 0.048 |
| <b>Immune score</b>             |         | $0.011 \pm 0.0031$          | $0.183 \pm 0.0720$        | <0.05 |
| <b>Stromal score</b>            |         | $0.032 \pm 0.012$           | $0.029 \pm 0.012$         | 0.870 |

**Supplementary Table S6.** Enriched fractions of the 64 cell types in metastatic and non-metastatic primary TNBC tumors in the Zurich cohort.

| Cell Type                         | Group   | xCell Enrichment Scores for 64- Cell Types<br>(mean $\pm$ SD)-Zurich Cohort |                                         |         |
|-----------------------------------|---------|-----------------------------------------------------------------------------|-----------------------------------------|---------|
|                                   |         | Metastatic Primary Tumors<br>(n=13)                                         | Non-Metastatic Primary Tumors<br>(n=18) | P-Value |
| Adipocytes                        | Stromal | 0.00652 $\pm$ 0.004                                                         | 0.0217 $\pm$ 0.009                      | 0.215   |
| Astrocytes                        | Others  | 0.0 $\pm$ 0.0                                                               | 0.0 $\pm$ 0.0                           |         |
| B cells                           | Immune  | 0.008 $\pm$ 0.0038                                                          | 0.038 $\pm$ 0.0146                      | 0.100   |
| Basophils                         | Immune  | 0.0152 $\pm$ 0.024                                                          | 0.031 $\pm$ 0.007                       | 0.135   |
| CD4 T cells                       | Immune  | 0.0018 $\pm$ 0.0008                                                         | 0.0035 $\pm$ 0.0018                     | 0.449   |
| Central Memory CD4+T cell         | Immune  | 0.0027 $\pm$ 0.0028                                                         | 0.0018 $\pm$ 0.0013                     | 0.737   |
| Effector Memory CD4+T cell        | Immune  | 0.0 $\pm$ 0.0                                                               | 0.022 $\pm$ 0.008                       | <0.05   |
| CD4 memory T cells                | Immune  | 0.0048 $\pm$ 0.0023                                                         | 0.0127 $\pm$ 0.005                      | 0.203   |
| CD4 naïve T cells                 | Immune  | 0.0009 $\pm$ 0.0005                                                         | 0.0007 $\pm$ 0.0006                     | 0.833   |
| CD8 T cells                       | Immune  | 0.0015 $\pm$ 0.001                                                          | 0.011 $\pm$ 0.005                       | 0.098   |
| Central Memory CD8+ T cell        | Immune  | 0.003031 $\pm$ 0.001597                                                     | 0.021 $\pm$ 0.006                       | <0.05   |
| Effector Memory CD8+T cell        | Immune  | 0.0 $\pm$ 0.0                                                               | 0.002 $\pm$ 0.0012                      | 0.160   |
| CD8 naïve T cells                 | Immune  | 0.0008 $\pm$ 0.0005                                                         | 0.006 $\pm$ 0.0018                      | <0.05   |
| Common Lymphoid Progenitor        | Stem    | 0.012 $\pm$ 0.005                                                           | 0.018 $\pm$ 0.0047                      | 0.429   |
| Common Myeloid Progenitor         | Stem    | 0.00012 $\pm$ 0.00007                                                       | 0.00012 $\pm$ 0.00009                   | 0.924   |
| Chondrocytes                      | Stromal | 0.003 $\pm$ 0.002                                                           | 0.0079 $\pm$ 0.004                      | 0.299   |
| Class-switched memory B cells     | Immune  | 0.0212 $\pm$ 0.007                                                          | 0.033 $\pm$ 0.009                       | 0.392   |
| Dendritic Cells                   | Immune  | 0.00015 $\pm$ 0.00012                                                       | 0.0045 $\pm$ 0.0012                     | <0.05   |
| Endothelial cells                 | Stromal | 0.0103 $\pm$ 0.0036                                                         | 0.0309 $\pm$ 0.0092                     | 0.077   |
| Eosinophils                       | Immune  | 0.0 $\pm$ 0.0                                                               | 0.0 $\pm$ 0.0                           |         |
| Epithelial cells                  | Others  | 0.015 $\pm$ 0.003                                                           | 0.021 $\pm$ 0.004                       | 0.222   |
| Erythrocytes                      | Stem    | 0.0 $\pm$ 0.0                                                               | 0.0 $\pm$ 0.0                           |         |
| Fibroblasts                       | Stromal | 0.040 $\pm$ 0.015                                                           | 0.088 $\pm$ 0.023                       | 0.112   |
| Granulocyte Macrophage Progenitor | Stem    | 0.0034 $\pm$ 0.0014                                                         | 0.003 $\pm$ 0.0008                      | 0.197   |
| HSC                               | Stem    | 0.161 $\pm$ 0.037                                                           | 0.192 $\pm$ 0.037                       | 0.560   |
| Hepatocytes                       | Others  | 0.0004 $\pm$ 0.0003                                                         | 0.001 $\pm$ 0.0005                      | 0.110   |
| Keratinocytes                     | Others  | 0.0048 $\pm$ 0.0019                                                         | 0.0018 $\pm$ 0.0006                     | 0.105   |

|                                    |         |                       |                       |       |
|------------------------------------|---------|-----------------------|-----------------------|-------|
| Megakaryocyte Erythroid Progenitor | Stem    | $0.016 \pm 0.004$     | $0.012 \pm 0.003$     | 0.424 |
| Multipotent Progenitor             | Stem    | $0.0 \pm 0.0$         | $0.0 \pm 0.0$         |       |
| Mesenchymal Stem Cells             | Stem    | $0.084 \pm 0.022$     | $0.053 \pm 0.013$     | 0.217 |
| Macrophages                        | Immune  | $0.005 \pm 0.002$     | $0.013 \pm 0.004$     | 0.145 |
| Macrophage M1                      | Immune  | $0.003 \pm 0.0018$    | $0.007 \pm 0.003$     | 0.278 |
| Macrophage M2                      | Immune  | $0.0038 \pm 0.0024$   | $0.007 \pm 0.002$     | 0.274 |
| Mast cells                         | Immune  | $0.00004 \pm 0.00005$ | $0.002 \pm 0.0008$    | <0.05 |
| Memory B cells                     | Immune  | $0.00036 \pm 0.0003$  | $0.006 \pm 0.003$     | 0.083 |
| Mesangial cells                    | Others  | $0.0047 \pm 0.014$    | $0.0054 \pm 0.0015$   | 0.768 |
| Monocytes                          | Immune  | $0.0 \pm 0.0$         | $0.004 \pm 0.002$     | 0.05  |
| Myocytes                           | Stromal | $0.009 \pm 0.006$     | $0.001 \pm 0.0004$    | 0.134 |
| NK cells                           | Immune  | $0.0 \pm 0.0$         | $0.0 \pm 0.0$         |       |
| Natural killer T cells             | Immune  | $0.0124 \pm 0.004$    | $0.015 \pm 0.004$     | 0.672 |
| Neutrophils                        | Immune  | $0.0 \pm 0.0$         | $0.0 \pm 0.0$         |       |
| Neurons                            | Others  | $0.0003 \pm 0.0001$   | $0.0015 \pm 0.0003$   | <0.05 |
| Osteoblasts                        | Stromal | $0.002 \pm 0.0009$    | $0.014 \pm 0.005$     | 0.076 |
| Pericytes                          | Stromal | $0.039 \pm 0.010$     | $0.030794 \pm 0.006$  | 0.500 |
| Plasma cells                       | Immune  | $0.0006 \pm 0.0003$   | $0.007 \pm 0.003$     | 0.055 |
| Platelets                          | Stem    | $0.0 \pm 0.0$         | $0.0 \pm 0.0$         |       |
| Preadipocytes                      | Stromal | $0.021 \pm 0.006$     | $0.025 \pm 0.005$     | 0.641 |
| Sebocytes                          | Others  | $0.0002 \pm 0.00001$  | $0.00006 \pm 0.00004$ | 0.181 |
| Skeletal muscle                    | Stromal | $0.0 \pm 0.0$         | $0.0 \pm 0.0$         |       |
| Smooth muscle                      | Stromal | $0.058 \pm 0.017$     | $0.026 \pm 0.010$     | 0.105 |
| Gamma delta T cells                | Immune  | $0.005 \pm 0.002$     | $0.027 \pm 0.006$     | <0.05 |
| Th1 cells                          | Immune  | $0.0 \pm 0.0$         | $0.0 \pm 0.0$         |       |
| Th2 cells                          | Immune  | $0.026 \pm 0.011$     | $0.080 \pm 0.019$     | <0.05 |
| Regulatory T cells                 | Immune  | $0.002 \pm 0.00009$   | $0.0004 \pm 0.0004$   | 0.138 |
| Activated dendritic cells          | Immune  | $0.002 \pm 0.001$     | $0.047 \pm 0.017$     | <0.05 |
| Conventional dendritic cells       | Immune  | $0.019 \pm 0.006$     | $0.0679 \pm 0.012$    | <0.05 |
| Immature dendritic cells           | Immune  | $0.052 \pm 0.010$     | $0.085 \pm 0.016$     | 0.14  |
| Lymphatic endothelial cells        | Stromal | $0.0013 \pm 0.0007$   | $0.008 \pm 0.0034$    | 0.119 |
| Microvascular endothelial cells    | Stromal | $0.009 \pm 0.022$     | $0.031 \pm 0.004$     | 0.472 |
| Naïve B cells                      | Immune  | $0.002 \pm 0.0011$    | $0.002 \pm 0.001$     | 0.967 |
| Plasmacytoid cells                 | Immune  | $0.00003 \pm 0.00003$ | $0.005 \pm 0.002$     | 0.062 |
| Pro-B cells                        | Immune  | $0.0009 \pm 0.0009$   | $0.008 \pm 0.0025$    | <0.05 |
| Megakaryocytes                     | Stem    | $0.0006 \pm 0.0002$   | $0.004 \pm 0.001$     | 0.025 |
| Melanocytes                        | Others  | $0.0005 \pm 0.0001$   | $0.001 \pm 0.0003$    | 0.094 |
| <b>Immune score</b>                |         | $0.011 \pm 0.002$     | $0.051 \pm 0.017$     | 0.057 |
| <b>Stromal score</b>               |         | $0.028 \pm 0.010$     | $0.070 \pm 0.020$     | 0.109 |

**Supplementary Table S7.** Enriched fractions of the 64 cell types in primary and matched TNBC tumors in the Stavanger cohort.

| Cell Type                               | Group   | xCell Enrichment Scores for 64- Cell Types<br>(mean $\pm$ SD)-Stavanger Cohort |                                    |                     |
|-----------------------------------------|---------|--------------------------------------------------------------------------------|------------------------------------|---------------------|
|                                         |         | Primary Tumors<br>(n=5)                                                        | Matched Metastatic<br>Tumors (n=5) | <i>P</i> -<br>Value |
| Adipocytes                              | Stromal | 0.016 $\pm$ 0.011                                                              | 0.0008 $\pm$ 0.0005                | 0.198               |
| Astrocytes                              | Others  | 0.0 $\pm$ 0.0                                                                  | 0.0068 $\pm$ 0.005                 | 0.181               |
| B cells                                 | Immune  | 0.002 $\pm$ 0.001                                                              | 0.011 $\pm$ 0.011                  | 0.453               |
| Basophils                               | Immune  | 0.024 $\pm$ 0.017                                                              | 0.023 $\pm$ 0.013                  | 0.995               |
| CD4 T cells                             | Immune  | 0.0 $\pm$ 0.0                                                                  | 0.0 $\pm$ 0.0                      |                     |
| Central Memory<br>CD4+T cell            | Immune  | 0.0 $\pm$ 0.0                                                                  | 0.0 $\pm$ 0.0                      |                     |
| Effector Memory<br>CD4+T cell           | Immune  | 0.0003 $\pm$ 0.0003                                                            | 0.005 $\pm$ 0.0034                 | 0.236               |
| CD4 memory T<br>cells                   | Immune  | 0.0001 $\pm$ 0.0001                                                            | 0.0 $\pm$ 0.0                      | 0.347               |
| CD4 naïve T cells                       | Immune  | 0.0 $\pm$ 0.0                                                                  | 0.0 $\pm$ 0.0                      |                     |
| CD8 T cells                             | Immune  | 0.0 $\pm$ 0.0                                                                  | 0.0 $\pm$ 0.0                      |                     |
| Central Memory<br>CD8+ T cell           | Immune  | 0.00034 $\pm$ 0.00034                                                          | 4.000e-005 $\pm$ 4.000e-005        | 0.406               |
| Effector Memory<br>CD8+T cell           | Immune  | 0.0 $\pm$ 0.0                                                                  | 0.0 $\pm$ 0.0                      |                     |
| CD8 naïve T cells                       | Immune  | 0.0 $\pm$ 0.0                                                                  | 0.0013 $\pm$ 0.001                 | 0.275               |
| Common Lymphoid<br>Progenitor           | Stem    | 0.004 $\pm$ 0.004                                                              | 0.015 $\pm$ 0.0069                 | 0.218               |
| Common Myeloid<br>Progenitor            | Stem    | 0.0002 $\pm$ 0.0002                                                            | 0.0 $\pm$ 0.0                      | 0.347               |
| Chondrocytes                            | Stromal | 0.0035 $\pm$ 0.0026                                                            | 0.00264 $\pm$ 0.00264              | 0.820               |
| Class-switched<br>memory B cells        | Immune  | 0.006 $\pm$ 0.002                                                              | 0.002 $\pm$ 0.002                  | 0.336               |
| Dendritic Cells                         | Immune  | 0.0 $\pm$ 0.0                                                                  | 0.0001 $\pm$ 0.0001                | 0.347               |
| Endothelial cells                       | Stromal | 0.006 $\pm$ 0.004                                                              | 0.015 $\pm$ 0.009                  | 0.347               |
| Eosinophils                             | Immune  | 0.0003 $\pm$ 0.0003                                                            | 0.00156 $\pm$ 0.00156              | 0.442               |
| Epithelial cells                        | Others  | 0.004 $\pm$ 0.003                                                              | 0.01248 $\pm$ 0.009654             | 0.446               |
| Erythrocytes                            | Stem    | 0.0 $\pm$ 0.0                                                                  | 0.0 $\pm$ 0.0                      |                     |
| Fibroblasts                             | Stromal | 0.003 $\pm$ 0.003                                                              | 0.03746 $\pm$ 0.01902              | 0.115               |
| Granulocyte<br>Macrophage<br>Progenitor | Stem    | 0.00014 $\pm$ 0.00014                                                          | 0.0 $\pm$ 0.0                      | 0.346               |
| HSC                                     | Stem    | 0.045 $\pm$ 0.013                                                              | 0.049 $\pm$ 0.018                  | 0.846               |
| Hepatocytes                             | Others  | 0.0006 $\pm$ 0.0006                                                            | 0.003 $\pm$ 0.0027                 | 0.403               |
| Keratinocytes                           | Others  | 0.0005 $\pm$ 0.0003                                                            | 0.008 $\pm$ 0.006                  | 0.255               |

|                                    |         |                                           |                                           |        |
|------------------------------------|---------|-------------------------------------------|-------------------------------------------|--------|
| Megakaryocyte Erythroid Progenitor | Stem    | $0.0097 \pm 0.005$                        | $0.007 \pm 0.003$                         | 0.736  |
| Multipotent Progenitor             | Stem    | $0.0 \pm 0.0$                             | $0.0 \pm 0.0$                             |        |
| Mesenchymal Stem Cells             | Stem    | $0.053 \pm 0.023$                         | $0.034 \pm 0.015$                         | 0.513  |
| Macrophages                        | Immune  | $0.002 \pm 0.0015$                        | $0.0014 \pm 0.0006$                       | 0.912  |
| Macrophage M1                      | Immune  | $0.002 \pm 0.0015$                        | $0.001 \pm 0.0005$                        | 0.561  |
| Macrophage M2                      | Immune  | $0.0018 \pm 0.0009$                       | $0.00052 \pm 0.0002$                      | 0.233  |
| Mast cells                         | Immune  | $0.004 \pm 0.0018$                        | $2.000\text{e-}005 \pm 2.000\text{e-}005$ | 0.044  |
| Memory B cells                     | Immune  | $0.0 \pm 0.0$                             | $0.001 \pm 0.0013$                        | 0.322  |
| Mesangial cells                    | Others  | $0.004 \pm 0.0024$                        | $0.0005 \pm 0.0005$                       | 0.234  |
| Monocytes                          | Immune  | $0.0 \pm 0.0$                             | $0.0 \pm 0.0$                             |        |
| Myocytes                           | Stromal | $0.001 \pm 0.0007$                        | $0.0044 \pm 0.0043$                       | 0.473  |
| NK cells                           | Immune  | $0.0 \pm 0.0$                             | $0.0 \pm 0.0$                             |        |
| Natural killer T cells             | Immune  | $0.0046 \pm 0.003$                        | $0.007 \pm 0.005$                         | 0.6702 |
| Neutrophils                        | Immune  | $0.0 \pm 0.0$                             | $0.0 \pm 0.0$                             |        |
| Neurons                            | Others  | $0.00024 \pm 0.00011$                     | $6.000\text{e-}005 \pm 6.000\text{e-}005$ | 0.195  |
| Osteoblasts                        | Stromal | $0.002 \pm 0.0014$                        | $0.00868 \pm 0.005$                       | 0.307  |
| Pericytes                          | Stromal | $0.0 \pm 0.0$                             | $0.01572 \pm 0.012$                       | 0.232  |
| Plasma cells                       | Immune  | $0.00578 \pm 0.003723$                    | $0.0040 \pm 0.0012$                       | 0.662  |
| Platelets                          | Stem    | $0.0008 \pm 0.0008$                       | $0.0059 \pm 0.0012$                       | 0.007  |
| Preadipocytes                      | Stromal | $0.0071 \pm 0.003420$                     | $0.0198 \pm 0.01213$                      | 0.343  |
| Sebocytes                          | Others  | $0.0006 \pm 0.0004$                       | $0.00306 \pm 0.0026$                      | 0.380  |
| Skeletal muscle                    | Stromal | $0.0 \pm 0.0$                             | $0.00144 \pm 0.001$                       | 0.346  |
| Smooth muscle                      | Stromal | $0.01926 \pm 0.01184$                     | $0.042 \pm 0.017$                         | 0.303  |
| Gamma delta T cells                | Immune  | $2.000\text{e-}005 \pm 2.000\text{e-}005$ | $0.0 \pm 0.0$                             | 0.347  |
| Th1 cells                          | Immune  | $0.007 \pm 0.005$                         | $0.004 \pm 0.002$                         | 0.590  |
| Th2 cells                          | Immune  | $0.033 \pm 0.015$                         | $0.016 \pm 0.011$                         | 0.392  |
| Regulatory T cells                 | Immune  | $0.0 \pm 0.0$                             | $0.00098 \pm 0.0009$                      | 0.311  |
| Activated dendritic cells          | Immune  | $0.003 \pm 0.002$                         | $0.0019 \pm 0.0019$                       | 0.711  |
| Conventional dendritic cells       | Immune  | $0.0 \pm 0.0$                             | $0.008 \pm 0.003$                         | 0.0477 |
| Immature dendritic cells           | Immune  | $0.019 \pm 0.007$                         | $0.052 \pm 0.019$                         | 0.165  |
| Lymphatic endothelial cells        | Stromal | $0.0004 \pm 0.0003$                       | $0.0015 \pm 0.002$                        | 0.503  |
| Microvascular endothelial cells    | Stromal | $0.003 \pm 0.002$                         | $0.008 \pm 0.006$                         | 0.419  |
| Naïve B cells                      | Immune  | $0.0008 \pm 0.0006$                       | $0.002 \pm 0.002$                         | 0.553  |
| Plasmacytoid cells                 | Immune  | $0.0 \pm 0.0$                             | $0.0 \pm 0.0$                             |        |

|                      |        |                    |                     |       |
|----------------------|--------|--------------------|---------------------|-------|
| Pro-B cells          | Immune | $0.0 \pm 0.0$      | $0.0021 \pm 0.0013$ | 0.142 |
| Megakaryocytes       | Stem   | $0.002 \pm 0.002$  | $0.001 \pm 0.0009$  | 0.654 |
| Melanocytes          | Others | $0.001 \pm 0.0006$ | $0.002 \pm 0.001$   | 0.755 |
| <b>Immune score</b>  |        | $0.003 \pm 0.0010$ | $0.011 \pm 0.007$   | 0.308 |
| <b>Stromal score</b> |        | $0.013 \pm 0.008$  | $0.027 \pm 0.013$   | 0.384 |
